# Supplementary material for: An Elaborated Study of CO Sensitivities of Cu, Pt and Pd Activated SnO<sub>2</sub> Sensors: Effect of Precipitation Agents, Dopants and Doping Methods
Source: Preprints.org preprint supplement (doi:10.20944/preprints201704.0014.v1), 2017-04-04
Supplement: Supplementary file 1 [file supplementary]

An elaborated study of CO sensitivities of Cu, Pt and Pd activated SnO2 sensors: Effect of precipitation agents, dopants and doping methods.

Venkata Krishna Karthik Tangirala 1*, Heberto Gómez-Pozos2, Ventura Rodríguez-Lugo3, M. de la L. Olvera1

1 Departamento de Ingeniería Eléctrica-SEES, Centro de Investigación y de Estudios Avanzados del Instituto Politécnico Nacional, CINVESTAV-IPN, Apartado postal 14740, México D. F. 07360, México. [krishnakarthik.tv@gmail.com](mailto:krishnakarthik.tv@gmail.com); [molvera@cinvestav.mx](mailto:molvera@cinvestav.mx).

2 Área académica de Computación y Electrónica, ICBI, Universidad Autónoma del Estado de Hidalgo, Hidalgo, 56092, México. [gpozos@uaeh.edu.mx](mailto:gpozos@uaeh.edu.mx).

1 Área Académica de Ciencias de la Tierra y Materiales, Instituto de Ciencias Básicas e Ingeniería, Universidad Autónoma del Estado de Hidalgo, Carretera Pachuca-Tulancingo Km. 4.5, 42184. Hidalgo, México. [ventura.rl65@gmail.com](mailto:ventura.rl65@gmail.com).

***** Correspondence: [krishnakarthik.tv@gmail.com](mailto:krishnakarthik.tv@gmail.com) ; Tel.: +52-553-194-7927

**Suppelmentary data:**

**
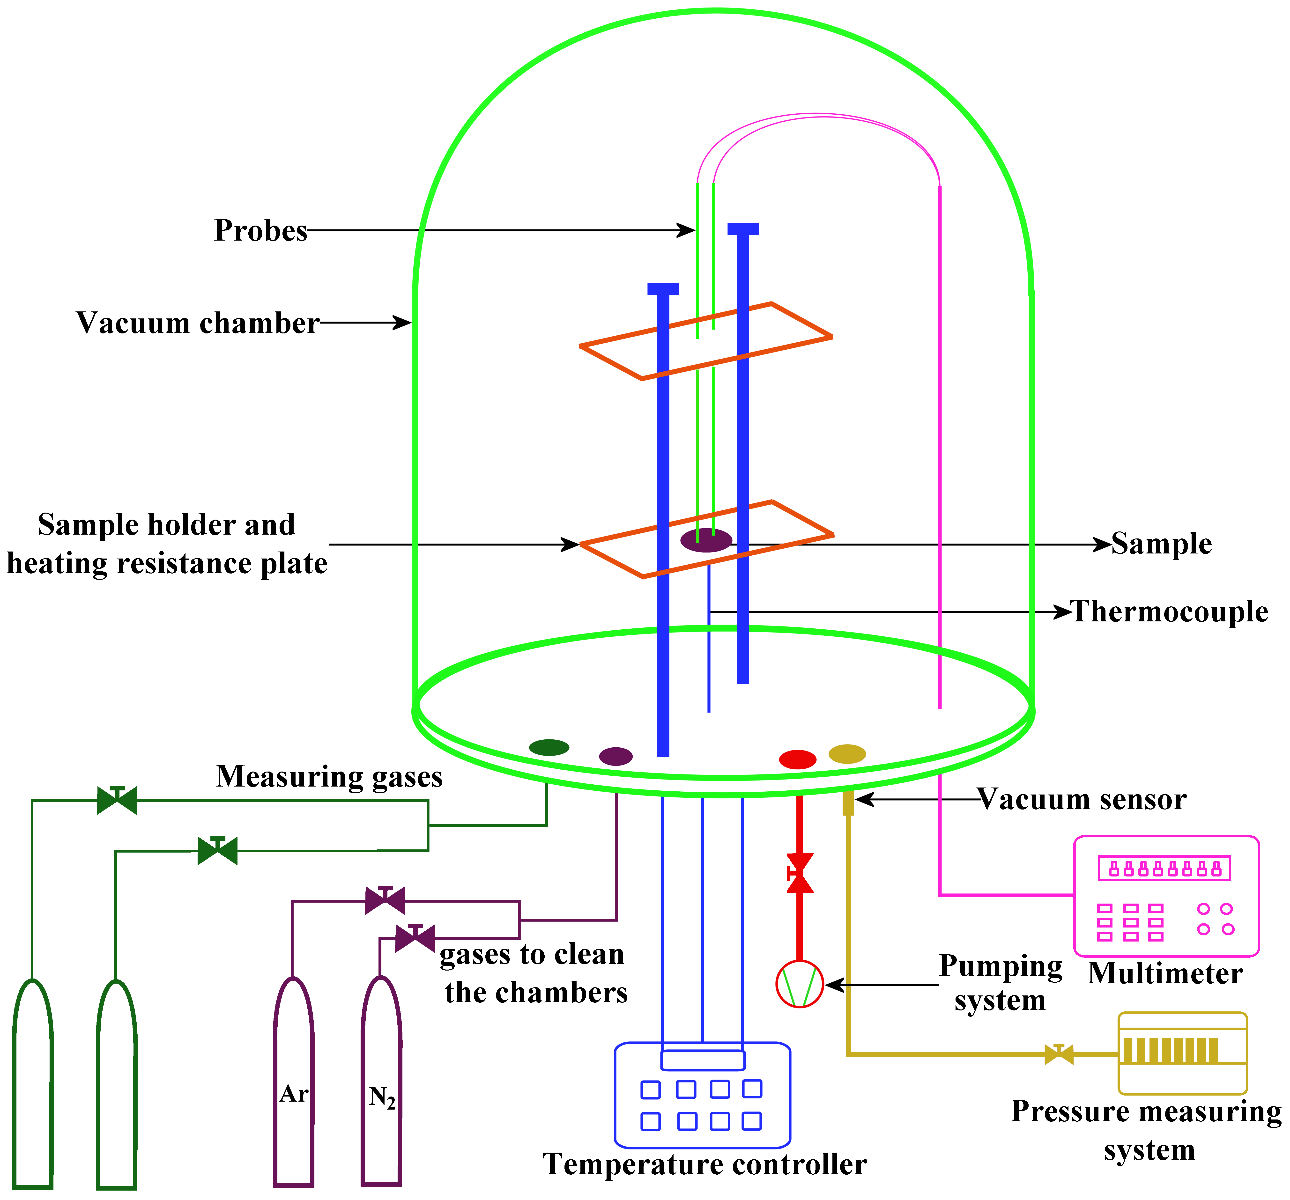
**

**Figure S1.** Schematic diagram of homemade gas sensing system.
